# Supplementary material for: Comparative analysis of the surface exposed proteome of two canine osteosarcoma cell lines and normal canine osteoblasts
Source: PubMed Central journal article supplement (PMC3684535; doi:10.1186/1746-6148-9-116), 2013-06-13

| Sample Name | Target Name | cT       | dCT      | RQ       | RQ average | Percent of highest expressor |
|-------------|-------------|----------|----------|----------|------------|------------------------------|
| CNOB #1     | CD44        | 23.13586 | 2.016206 | 0.247207 | 0.192388   | 128.4942                     |
| CNOB #2     | CD44        | 21.0001  | 2.465452 | 0.181061 |            | 94.11242                     |
| CNOB #3     | CD44        | 21.46163 | 2.747622 | 0.148896 |            | 77.39363                     |
| HMPOS #1    | CD44        | 23.00928 | 5.204315 | 0.027123 |            | 14.09831                     |
| HMPOS #2    | CD44        | 23.79644 | 5.395113 | 0.023763 |            | 12.35183                     |
| HMPOS #3    | CD44        | 23.33386 | 5.318661 | 0.025057 |            | 13.02404                     |
| POS #1      | CD44        | 23.17706 | 4.960126 | 0.032126 |            | 16.69842                     |
| POS #2      | CD44        | 22.44697 | 4.295809 | 0.050913 |            | 26.46395                     |
| POS #3      | CD44        | 22.72163 | 4.401646 | 0.047312 |            | 24.59205                     |
| CNOB #1     | CRISP       | 32.41168 | 11.29203 | 0.000399 |            | 1.293601                     |
| CNOB #2     | CRISP       | 29.50583 | 10.97118 | 0.000498 |            | 1.615792                     |
| CNOB #3     | CRISP       | 29.34538 | 10.63137 | 0.00063  |            | 2.044929                     |
| HMPOS #1    | CRISP       | 22.83478 | 5.029814 | 0.030611 |            | 99.29234                     |
| HMPOS #2    | CRISP       | 23.35318 | 4.951854 | 0.03231  |            | 104.8055                     |
| HMPOS #3    | CRISP       | 23.1626  | 5.147403 | 0.028215 |            | 91.5204                      |
| POS #1      | CRISP       | 23.3139  | 5.096968 | 0.029219 | 0.030829   | 94.77644                     |
| POS #2      | CRISP       | 23.25063 | 5.099467 | 0.029168 |            | 94.61238                     |
| POS #3      | CRISP       | 23.1941  | 4.874121 | 0.034099 |            | 110.6074                     |
| CNOB #1     | CSPG4       | 28.53679 | 7.417137 | 0.005851 | 0.006764   | 86.49992                     |
| CNOB #2     | CSPG4       | 25.87884 | 7.344185 | 0.006154 |            | 90.9864                      |
| CNOB #3     | CSPG4       | 25.62913 | 6.915125 | 0.008286 |            | 122.5001                     |
| HMPOS #1    | CSPG4       | 30.82357 | 13.01861 | 0.000121 |            | 1.781579                     |
| HMPOS #2    | CSPG4       | 29.51386 | 11.11254 | 0.000452 |            | 6.677113                     |
| HMPOS #3    | CSPG4       | 29.63965 | 11.62445 | 0.000317 |            | 4.682608                     |
| POS #1      | CSPG4       | 26.56912 | 8.352187 | 0.00306  |            | 45.24156                     |
| POS #2      | CSPG4       | 25.687   | 7.535838 | 0.005389 |            | 79.66785                     |
| POS #3      | CSPG4       | 25.01224 | 6.692256 | 0.00967  |            | 142.964                      |
| CNOB #1     | Ephrin      | 25.07185 | 3.952203 | 0.064605 |            | 8.465948                     |
| CNOB #2     | Ephrin      | 21.60244 | 3.067783 | 0.119263 |            | 15.62832                     |
| CNOB #3     | Ephrin      | 21.70168 | 2.987675 | 0.126072 |            | 16.52066                     |
| HMPOS #1    | Ephrin      | 18.32865 | 0.52369  | 0.69559  |            | 91.15084                     |
| HMPOS #2    | Ephrin      | 19.4233  | 1.021976 | 0.492442 |            | 64.53003                     |
| HMPOS #3    | Ephrin      | 19.18371 | 1.168519 | 0.444878 |            | 58.29723                     |
| POS #1      | Ephrin      | 18.88903 | 0.672096 | 0.627594 | 0.76312    | 82.24055                     |
| POS #2      | Ephrin      | 18.73118 | 0.580022 | 0.668954 |            | 87.66035                     |
| POS #3      | Ephrin      | 18.33039 | 0.010409 | 0.992811 |            | 130.0989                     |
| CNOB #1     | Fibronectin | 16.88421 | -4.23544 | 18.83627 | 12.14606   | 155.0813                     |
| CNOB #2     | Fibronectin | 15.49002 | -3.04464 | 8.251387 |            | 67.93468                     |
| CNOB #3     | Fibronectin | 15.48896 | -3.22505 | 9.350533 |            | 76.98408                     |
| HMPOS #1    | Fibronectin | 19.08379 | 1.278823 | 0.412132 |            | 3.39313                      |
| HMPOS #2    | Fibronectin | 19.17725 | 0.77593  | 0.584012 |            | 4.808241                     |
| HMPOS #3    | Fibronectin | 19.06694 | 1.051746 | 0.482384 |            | 3.971526                     |
| POS #1      | Fibronectin | 21.19233 | 2.975397 | 0.12715  |            | 1.046841                     |
| POS #2      | Fibronectin | 20.4989  | 2.347744 | 0.196453 |            | 1.617422                     |
| POS #3      | Fibronectin | 20.5229  | 2.202916 | 0.217198 |            | 1.788219                     |
| CNOB #1     | GAPDH       | 21.11965 |          |          |            |                              |
| CNOB #2     | GAPDH       | 18.53465 |          |          |            |                              |
| CNOB #3     | GAPDH       | 18.71401 |          |          |            |                              |
| HMPOS #1    | GAPDH       | 17.80496 |          |          |            |                              |
| HMPOS #2    | GAPDH       | 18.40132 |          |          |            |                              |
| HMPOS #3    | GAPDH       | 18.01519 |          |          |            |                              |
| POS #1      | GAPDH       | 18.21693 |          |          |            |                              |
| POS #2      | GAPDH       | 18.15116 |          |          |            |                              |
| POS #3      | GAPDH       | 18.31998 |          |          |            |                              |
| CNOB #1     | Neuropilin  | 30.41339 | 9.293736 | 0.001593 |            | 19.15525                     |
| CNOB #2     | Neuropilin  | 28.19921 | 9.664563 | 0.001232 |            | 14.8135                      |
| CNOB #3     | Neuropilin  | 28.49608 | 9.782075 | 0.001136 |            | 13.65473                     |
| HMPOS #1    | Neuropilin  | 24.60546 | 6.800492 | 0.008971 |            | 107.8522                     |
| HMPOS #2    | Neuropilin  | 25.20691 | 6.805588 | 0.00894  |            | 107.4719                     |
| HMPOS #3    | Neuropilin  | 25.16452 | 7.149323 | 0.007044 |            | 84.68774                     |
| POS #1      | Neuropilin  | 26.06575 | 7.84882  | 0.004338 |            | 52.14959                     |

|          |            |          |          |          |  |          |
|----------|------------|----------|----------|----------|--|----------|
| POS #2   | Neuropilin | 25.70851 | 7.557349 | 0.005309 |  | 63.82521 |
| POS #3   | Neuropilin | 25.30078 | 6.980798 | 0.007917 |  | 95.18128 |
| CNOB #1  | Notch      | 22.89121 | 1.771556 | 0.292893 |  | 94.01296 |
| CNOB #2  | Notch      | 20.12842 | 1.593764 | 0.331306 |  | 106.3429 |
| CNOB #3  | Notch      | 20.40164 | 1.687634 | 0.310436 |  | 99.64388 |
| HMPOS #1 | Notch      | 19.82154 | 2.016578 | 0.247144 |  | 79.32843 |
| HMPOS #2 | Notch      | 20.46591 | 2.064587 | 0.239055 |  | 76.73203 |
| HMPOS #3 | Notch      | 20.19525 | 2.180057 | 0.220667 |  | 70.82993 |
| POS #1   | Notch      | 21.30671 | 3.089778 | 0.117458 |  | 37.70191 |
| POS #2   | Notch      | 21.31149 | 3.160326 | 0.111853 |  | 35.90263 |
| POS #3   | Notch      | 20.80105 | 2.481064 | 0.179112 |  | 57.49162 |

| Sample   | Target | cT       | dCT      | RQ       | RQ average | percent of highest expressor |
|----------|--------|----------|----------|----------|------------|------------------------------|
| CNOB #1  | CD109  | 23.42008 | 5.447416 | 0.022917 |            | 47.25226                     |
| CNOB #2  | CD109  | 21.47563 | 6.122423 | 0.014354 |            | 29.59547                     |
| CNOB #3  | CD109  | 21.69626 | 6.068279 | 0.014903 |            | 30.72728                     |
| HMPOS #1 | CD109  | 21.05168 | 5.888552 | 0.01688  |            | 34.80387                     |
| HMPOS #2 | CD109  | 21.49851 | 6.099602 | 0.014583 |            | 30.06735                     |
| HMPOS #3 | CD109  | 20.91004 | 5.490641 | 0.022241 |            | 45.85754                     |
| POS #1   | CD109  | 21.00885 | 4.417347 | 0.0468   | 0.048517   | 96.49489                     |
| POS #2   | CD109  | 20.85791 | 4.137163 | 0.056832 |            | 117.1785                     |
| POS #3   | CD109  | 20.43959 | 4.5762   | 0.04192  |            | 86.43401                     |

|          |       |          |          |          |          |          |
|----------|-------|----------|----------|----------|----------|----------|
| CNOB #1  | CYR61 | 20.72338 | 2.750723 | 0.148576 | 0.130259 | 114.0623 |
| CNOB #2  | CYR61 | 18.43419 | 3.080976 | 0.118177 |          | 90.72478 |
| CNOB #3  | CYR61 | 18.63929 | 3.011307 | 0.124024 |          | 95.21352 |
| HMPOS #1 | CYR61 | 20.22349 | 5.060356 | 0.02997  |          | 23.0077  |
| HMPOS #2 | CYR61 | 19.98961 | 4.590702 | 0.041501 |          | 31.86055 |
| HMPOS #3 | CYR61 | 20.8294  | 5.409998 | 0.02352  |          | 18.05596 |
| POS #1   | CYR61 | 21.63343 | 5.041927 | 0.030355 |          | 23.30349 |
| POS #2   | CYR61 | 20.51461 | 3.793861 | 0.0721   |          | 55.35109 |
| POS #3   | CYR61 | 21.62322 | 5.759823 | 0.018455 |          | 14.16814 |

|          |                |          |          |          |          |          |
|----------|----------------|----------|----------|----------|----------|----------|
| CNOB #1  | Thrombospondin | 18.92333 | 0.950666 | 0.517393 | 0.615512 | 84.05903 |
| CNOB #2  | Thrombospondin | 15.82233 | 0.469124 | 0.722403 |          | 117.3662 |
| CNOB #3  | Thrombospondin | 16.34883 | 0.720854 | 0.606738 |          | 98.57456 |
| HMPOS #1 | Thrombospondin | 21.28823 | 6.125095 | 0.014327 |          | 2.327695 |
| HMPOS #2 | Thrombospondin | 22.98775 | 7.588842 | 0.005194 |          | 0.843906 |
| HMPOS #3 | Thrombospondin | 22.00548 | 6.586081 | 0.010409 |          | 1.691047 |
| POS #1   | Thrombospondin | 20.87632 | 4.284813 | 0.051303 |          | 8.335013 |
| POS #2   | Thrombospondin | 20.20524 | 3.484489 | 0.089344 |          | 14.51535 |
| POS #3   | Thrombospondin | 20.17234 | 4.308945 | 0.050452 |          | 8.196753 |

|          |       |          |  |  |  |  |
|----------|-------|----------|--|--|--|--|
| CNOB #1  | GAPDH | 17.97266 |  |  |  |  |
| CNOB #2  | GAPDH | 15.35321 |  |  |  |  |
| CNOB #3  | GAPDH | 15.62798 |  |  |  |  |
| HMPOS #1 | GAPDH | 15.16313 |  |  |  |  |
| HMPOS #2 | GAPDH | 15.39891 |  |  |  |  |
| HMPOS #3 | GAPDH | 15.4194  |  |  |  |  |
| POS #1   | GAPDH | 16.5915  |  |  |  |  |
| POS #2   | GAPDH | 16.72075 |  |  |  |  |
| POS #3   | GAPDH | 15.86339 |  |  |  |  |

|          |        |          |          |          |         |          |
|----------|--------|----------|----------|----------|---------|----------|
| CNOB #1  | PLEXIN | 28.36173 | 10.38907 | 0.000746 |         | 1.462208 |
| CNOB #2  | PLEXIN | 22.22058 | 6.867369 | 0.008565 |         | 16.79368 |
| CNOB #3  | PLEXIN | 22.52238 | 6.894402 | 0.008406 |         | 16.48193 |
| HMPOS #1 | PLEXIN | 20.39164 | 5.228504 | 0.026672 |         | 52.29898 |
| HMPOS #2 | PLEXIN | 20.77953 | 5.380619 | 0.024003 |         | 47.06544 |
| HMPOS #3 | PLEXIN | 20.47197 | 5.05257  | 0.030132 |         | 59.08192 |
| POS #1   | PLEXIN | 20.63165 | 4.040146 | 0.060785 | 0.05106 | 119.1859 |
| POS #2   | PLEXIN | 20.99886 | 4.278107 | 0.051542 |         | 101.0628 |
| POS #3   | PLEXIN | 20.47677 | 4.613379 | 0.040854 |         | 80.1059  |

averages

standard deviations

|                | CnOb     | POS      | HMPOS    |                | CnOb     | POS      | HMPOS    |
|----------------|----------|----------|----------|----------------|----------|----------|----------|
| CD44           | 100.0001 | 22.58481 | 13.15806 | CD44           | 26.0541  | 5.18297  | 0.880921 |
| CRISP          | 1.651441 | 99.99873 | 98.53941 | CRISP          | 0.37693  | 9.187713 | 6.674472 |
| Ephrin 2a      | 13.53831 | 99.99994 | 71.32603 | Ephrin 2a      | 4.415396 | 26.20695 | 17.44934 |
| Fibronectin    | 100      | 1.484161 | 4.057632 | Fibronectin    | 47.9159  | 0.388239 | 1.974926 |
| Neuropilin     | 15.87449 | 70.38536 | 100.0039 | Neuropilin     | 2.899694 | 22.25328 | 13.26559 |
| Notch          | 15.87449 | 70.38536 | 100.0039 | Notch          | 6.172655 | 11.97883 | 4.355085 |
| CD109          | 35.85834 | 100.0358 | 36.90959 | CD109          | 9.883638 | 15.67514 | 8.102964 |
| CYR61          | 100.0002 | 30.94091 | 24.30807 | CYR61          | 12.38323 | 21.62768 | 6.993559 |
| Thrombospondin | 99.99994 | 10.34904 | 1.620883 | Thrombospondin | 16.69928 | 3.608796 | 0.744378 |
| Plexin 2b      | 11.57927 | 100.1182 | 52.81545 | Plexin 2b      | 8.763022 | 19.5571  | 6.024866 |
| CSPG4          | 99.99547 | 89.29113 | 4.380433 | CSPG4          | 19.61824 | 49.56686 | 2.461716 |

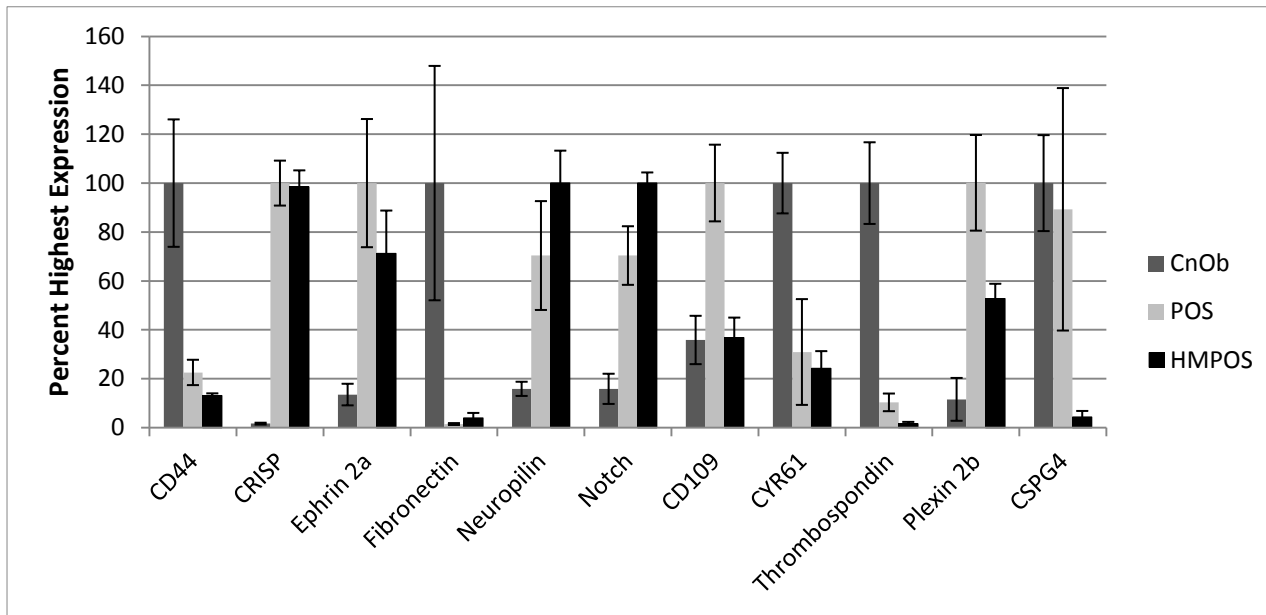

Supplement: 1746-6148-9-116-S3.pdf [file 1746-6148-9-116-S3.pdf]
