# Supplementary material for: Comparative analysis of the surface exposed proteome of two canine osteosarcoma cell lines and normal canine osteoblasts
Source: PubMed Central journal article supplement (PMC3684535; doi:10.1186/1746-6148-9-116), 2013-06-13

**Surface Marker MFI (IRDye800-conjugated Secondary Ab)**

|                       |   | CnOb  | CnOb  | CnOb  | CnOb  | POS   | POS  | POS   | POS   | HMPOS | HMPOS | HMPOS | HMPOS |
|-----------------------|---|-------|-------|-------|-------|-------|------|-------|-------|-------|-------|-------|-------|
|                       |   | 1     | 2     | 3     | 4     | 5     | 6    | 7     | 8     | 9     | 10    | 11    | 12    |
| Rat IgG Control       | A | 0.74  | 0.82  | 0.89  | 0.75  | 0.88  | 1.07 | 1.17  | 1.22  | 0.89  | 0.94  | 0.88  | 0.92  |
| anti-CD44 (Rat)       | B | 20.12 | 17.01 | 18.58 | 19.92 | 42.74 | 50.2 | 48.43 | 44.91 | 34.28 | 37.01 | 39.92 | 33.09 |
| Goat IgG Control      | C | 1.05  | 1.05  | 0.78  | 0.97  | 0.84  | 1.6  | 0.91  | 0.86  | 0.98  | 0.85  | 6.5   | 0.93  |
| anti-Thrombospondin D |   | 0.82  | 2.4   | 1.18  | 0.93  | 0.86  | 1.29 | 1.04  | 4.78  | 6.08  | 3.17  | 4.33  | 0.97  |
| anti-CYR61 (goat)     | E | 0.96  | 0.77  | 0.67  | 0.75  | 0.81  | 1.28 | 0.87  | 1.04  | 0.91  | 1.23  | 0.92  | 0.78  |
| anti-PlexinB2 (goat)  | F | 0.89  | 1.05  | 0.73  | 0.96  | 1.49  | 1.01 | 0.93  | 1.6   | 1.14  | 0.9   | 0.74  | 0.69  |
| Rabbit IgG control    | G | 1.09  | 0.98  | 0.67  | 0.76  | 2.31  | 1.6  | 1.77  | 0.73  | 0.69  | 0.72  | 0.71  | 0.66  |
| anti-NOTCH2 (rabbit)  | H | 0.94  | 0.84  | 0.99  | 1.75  | 0.75  | 0.79 | 1.7   | 0.79  | 1.48  | 0.67  | 0.64  | 0.7   |

**Nucleus Marker MFI (Abs/Emission = 365/460)**

|                       |   | CnOb    | CnOb    | CnOb    | CnOb    | POS     | POS     | POS     | POS     | HMPOS   | HMPOS   | HMPOS   | HMPOS   |
|-----------------------|---|---------|---------|---------|---------|---------|---------|---------|---------|---------|---------|---------|---------|
|                       |   | 1       | 2       | 3       | 4       | 5       | 6       | 7       | 8       | 9       | 10      | 11      | 12      |
| Rat IgG Control       | A | 860.449 | 850.381 | 957.79  | 907.183 | 927.116 | 1139.23 | 963.507 | 1019.56 | 802.839 | 821.393 | 817.417 | 939.896 |
| anti-CD44 (Rat)       | B | 902.882 | 829.961 | 915.448 | 834.639 | 1002.37 | 976.869 | 1018.53 | 962.911 | 811.959 | 802.55  | 824.984 | 841.35  |
| Goat IgG Control      | C | 809.096 | 792.512 | 812.346 | 1173.89 | 986.864 | 1212.17 | 1085.77 | 995.772 | 818.698 | 818.464 | 820.693 | 760.999 |
| anti-Thrombospondin D |   | 772.093 | 819.726 | 836.943 | 1099.17 | 917.614 | 1013.95 | 1084.44 | 955.283 | 792.96  | 802.744 | 795.897 | 783.072 |
| anti-CYR61 (goat)     | E | 722.716 | 819.744 | 755.119 | 830.366 | 899.015 | 1036.04 | 1007.84 | 966.902 | 764.702 | 862.765 | 792.097 | 756.522 |
| anti-PlexinB2 (goat)  | F | 781.195 | 816.825 | 799.14  | 809.978 | 865.342 | 1129.9  | 982.44  | 995.208 | 753.262 | 787.739 | 810.356 | 769.588 |
| Rabbit IgG control    | G | 716.049 | 792.636 | 749.218 | 861.094 | 1086.79 | 1128.12 | 1055.02 | 972.169 | 743.799 | 772.988 | 790.524 | 753.601 |
| anti-NOTCH2 (rabbit)  | H | 775.033 | 787.978 | 786.796 | 915     | 871.586 | 959.336 | 957.879 | 894.806 | 809.455 | 782.225 | 775.961 | 781.097 |

**Ratio Surface Marker/Nucleus Marker**

|                       |   | CnOb     | CnOb     | CnOb     | CnOb     | POS      | POS      | POS      | POS      | HMPOS    | HMPOS    | HMPOS    | HMPOS    |
|-----------------------|---|----------|----------|----------|----------|----------|----------|----------|----------|----------|----------|----------|----------|
|                       |   | 1        | 2        | 3        | 4        | 5        | 6        | 7        | 8        | 9        | 10       | 11       | 12       |
| Rat IgG Control       | A | 0.00086  | 0.000964 | 0.000929 | 0.000827 | 0.000949 | 0.000939 | 0.001214 | 0.001197 | 0.001109 | 0.001144 | 0.001077 | 0.000979 |
| anti-CD44 (Rat)       | B | 0.022284 | 0.020495 | 0.020296 | 0.023867 | 0.042639 | 0.051389 | 0.047549 | 0.04664  | 0.042219 | 0.046116 | 0.048389 | 0.03933  |
| Goat IgG Control      | C | 0.001298 | 0.001325 | 0.00096  | 0.000826 | 0.000851 | 0.00132  | 0.000838 | 0.000864 | 0.001197 | 0.001039 | 0.00792  | 0.001222 |
| anti-Thrombospondin D | D | 0.001062 | 0.002928 | 0.00141  | 0.000846 | 0.000937 | 0.001272 | 0.000959 | 0.005004 | 0.007667 | 0.003949 | 0.00544  | 0.001239 |
| anti-CYR61 (goat)     | E | 0.001328 | 0.000939 | 0.000887 | 0.000903 | 0.000901 | 0.001235 | 0.000863 | 0.001076 | 0.00119  | 0.001426 | 0.001161 | 0.001031 |
| anti-PlexinB2 (goat)  | F | 0.001139 | 0.001285 | 0.000913 | 0.001185 | 0.001722 | 0.000894 | 0.000947 | 0.001608 | 0.001513 | 0.001143 | 0.000913 | 0.000897 |
| Rabbit IgG control    | G | 0.001522 | 0.001236 | 0.000894 | 0.000883 | 0.002126 | 0.001418 | 0.001678 | 0.000751 | 0.000928 | 0.000931 | 0.000898 | 0.000876 |
| anti-NOTCH2 (rabbit)  | H | 0.001213 | 0.001066 | 0.001258 | 0.001913 | 0.000861 | 0.000823 | 0.001775 | 0.000883 | 0.001828 | 0.000857 | 0.000825 | 0.000896 |

**Ratio Surface Marker/Nucleus Marker (adjusted X 1,000)**

|                       |   | CnOb     | CnOb     | CnOb     | CnOb     | POS      | POS      | POS      | POS      | HMPOS    | HMPOS    | HMPOS    | HMPOS    |
|-----------------------|---|----------|----------|----------|----------|----------|----------|----------|----------|----------|----------|----------|----------|
|                       |   | 1        | 2        | 3        | 4        | 5        | 6        | 7        | 8        | 9        | 10       | 11       | 12       |
| Rat IgG Control       | A | 0.860016 | 0.964274 | 0.929222 | 0.826735 | 0.94918  | 0.939231 | 1.214314 | 1.196595 | 1.108566 | 1.144397 | 1.076562 | 0.978832 |
| anti-CD44 (Rat)       | B | 22.2842  | 20.49494 | 20.29607 | 23.86661 | 42.63895 | 51.38867 | 47.54892 | 46.63982 | 42.21888 | 46.11551 | 48.38882 | 39.32965 |
| Goat IgG Control      | C | 1.297745 | 1.324901 | 0.960182 | 0.826313 | 0.851181 | 1.319947 | 0.838115 | 0.863652 | 1.197023 | 1.038531 | 7.920136 | 1.222078 |
| anti-Thrombospondin D | D | 1.062048 | 2.927808 | 1.409893 | 0.846093 | 0.937213 | 1.272252 | 0.95902  | 5.003753 | 7.667474 | 3.948955 | 5.440402 | 1.238711 |
| anti-CYR61 (goat)     | E | 1.328323 | 0.939318 | 0.887277 | 0.903216 | 0.900986 | 1.235474 | 0.863232 | 1.0756   | 1.190006 | 1.425649 | 1.161474 | 1.031034 |
| anti-PlexinB2 (goat)  | F | 1.13928  | 1.285465 | 0.913482 | 1.185217 | 1.721863 | 0.893884 | 0.946623 | 1.607704 | 1.513418 | 1.14251  | 0.913179 | 0.896584 |
| Rabbit IgG control    | G | 1.522242 | 1.236381 | 0.894266 | 0.882598 | 2.125526 | 1.418289 | 1.677693 | 0.750898 | 0.92767  | 0.93145  | 0.898138 | 0.875795 |
| anti-NOTCH2 (rabbit)  | H | 1.212852 | 1.06602  | 1.258268 | 1.912568 | 0.8605   | 0.823486 | 1.774754 | 0.882873 | 1.828391 | 0.856531 | 0.824784 | 0.896176 |

**Average (MFI)**

|              | CnOb     | POS      | HMPOS    |
|--------------|----------|----------|----------|
| Rat IgG Cor  | 0.895062 | 1.07483  | 1.077089 |
| anti-CD44 (  | 21.73545 | 47.05409 | 44.01321 |
| Goat IgG Cr  | 1.102285 | 0.968224 | 2.844442 |
| anti-Throm   | 1.56146  | 2.04306  | 4.573886 |
| anti-CYR61   | 1.014533 | 1.018823 | 1.202041 |
| anti-PlexinI | 1.130861 | 1.292518 | 1.116423 |
| Rabbit IgG   | 1.133872 | 1.493102 | 0.908263 |
| anti-NOTCH   | 1.362427 | 1.085403 | 1.10147  |

**Standard Deviation**

|              | CnOb     | POS      | HMPOS    |
|--------------|----------|----------|----------|
| Rat IgG Cor  | 0.06286  | 0.15106  | 0.071124 |
| anti-CD44 (  | 1.678652 | 3.59159  | 4.029928 |
| Goat IgG Cr  | 0.247734 | 0.234714 | 3.384772 |
| anti-Throm   | 0.940043 | 1.979721 | 2.697843 |
| anti-CYR61   | 0.210323 | 0.171518 | 0.164352 |
| anti-PlexinI | 0.157249 | 0.432909 | 0.287473 |
| Rabbit IgG   | 0.306534 | 0.5746   | 0.026274 |
| anti-NOTCH   | 0.375826 | 0.460219 | 0.485493 |

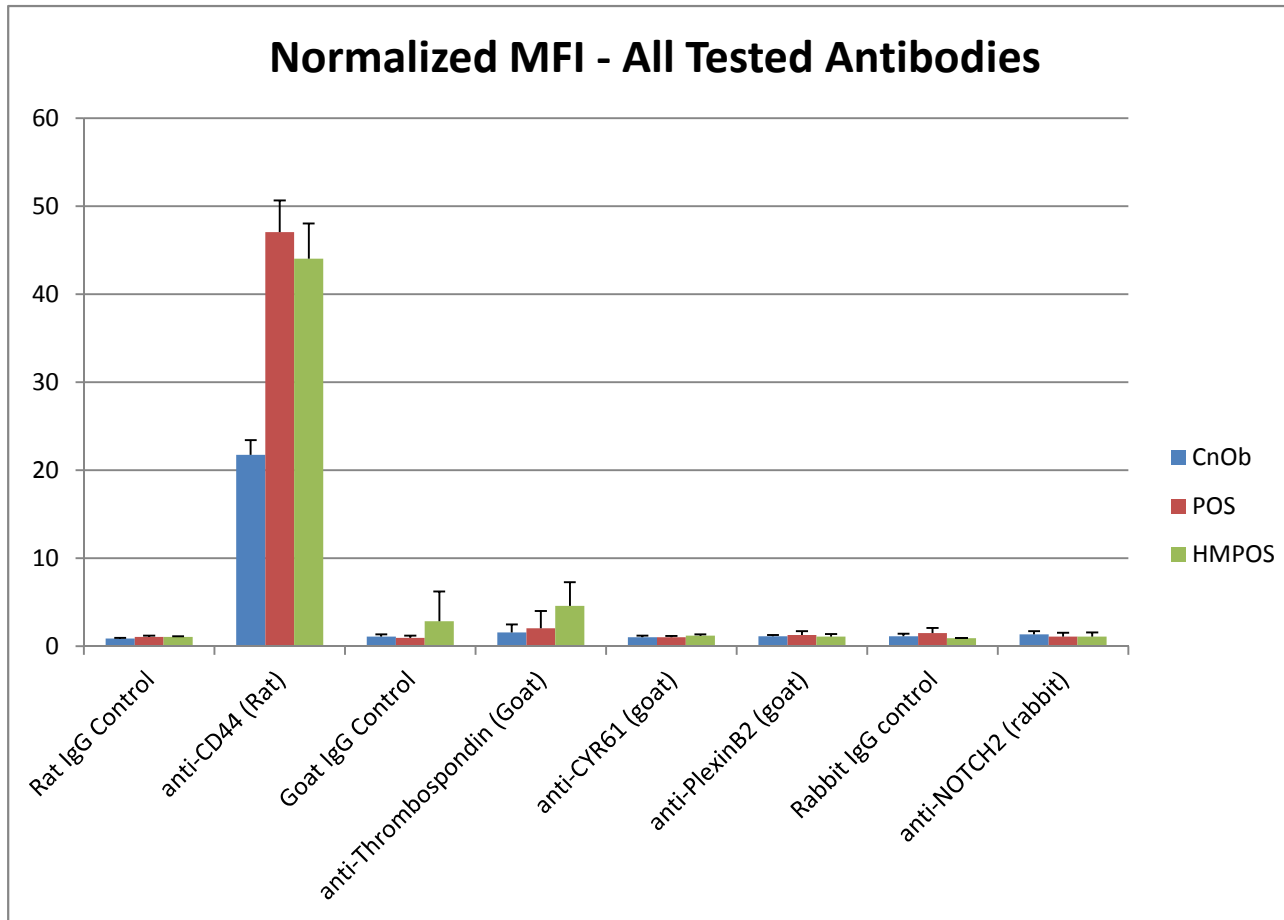

Supplement: 1746-6148-9-116-S4.pdf [file 1746-6148-9-116-S4.pdf]
