# Supplementary material for: Comparative analysis of the surface exposed proteome of two canine osteosarcoma cell lines and normal canine osteoblasts
Source: PubMed Central journal article supplement (PMC3684535; doi:10.1186/1746-6148-9-116), 2013-06-13
Supplement: 1746-6148-9-116-S1.pdf [file 1746-6148-9-116-S1.pdf]

| #  | Identified Proteins (122)                                                                                                    | Accession Number | Molecular Weight | # of unique peptides |       |     |
|----|------------------------------------------------------------------------------------------------------------------------------|------------------|------------------|----------------------|-------|-----|
|    |                                                                                                                              |                  |                  | CNOB                 | HMPOS | POS |
| 23 | PREDICTED: thrombospondin-1 [Canis lupus familiaris]                                                                         | gi 345794639     | 130 kDa          | 17                   | 0     | 0   |
| 18 | PREDICTED: fibronectin [Canis lupus familiaris]                                                                              | gi 345797318     | 271 kDa          | 16                   | 4     | 6   |
| 39 | plasminogen activator inhibitor 1 precursor [Canis lupus familiaris]                                                         | gi 308193314     | 45 kDa           | 8                    | 0     | 0   |
| 13 | glyceraldehyde-3-phosphate dehydrogenase [Canis lupus familiaris]                                                            | gi 50978862      | 36 kDa           | 5                    | 9     | 5   |
| 15 | serpin peptidase inhibitor, clade H (heat shock protein 47), member 1, (collagen binding protein 1) [Canis lupus familiaris] | gi 254674398     | 47 kDa           | 5                    | 5     | 10  |
| 21 | PREDICTED: prelamin-A/C isoform 4 [Canis lupus familiaris]                                                                   | gi 73960920      | 74 kDa           | 4                    | 10    | 4   |
| 2  | PREDICTED: tubulin alpha-1B chain [Canis lupus familiaris]                                                                   | gi 345792158     | 52 kDa           | 3                    | 13    | 14  |
| 10 | annexin 2 [Canis lupus familiaris]                                                                                           | gi 37695552      | 39 kDa           | 3                    | 8     | 10  |
| 19 | PREDICTED: protein CYR61 [Canis lupus familiaris]                                                                            | gi 73960107      | 42 kDa           | 3                    | 13    | 1   |
| 36 | vitronectin [Canis lupus]                                                                                                    | gi 62421374      | 8 kDa            | 2                    | 2     | 3   |
| 59 | PREDICTED: integrin beta-1 [Canis lupus familiaris]                                                                          | gi 345793345     | 88 kDa           | 2                    | 0     | 4   |
| 77 | PREDICTED: actin, alpha cardiac muscle 1 isoform 3 [Canis lupus familiaris]                                                  | gi 57108093      | 42 kDa           | 2                    | 0     | 1   |

|    |                                                                                         |                |         |   |    |    |
|----|-----------------------------------------------------------------------------------------|----------------|---------|---|----|----|
| 3  | PREDICTED: serine protease HTRA1 [Canis lupus familiaris]                               | gi   345792549 | 41 kDa  | 1 | 12 | 14 |
| 5  | elongation factor 1-alpha 1 [Canis lupus familiaris]                                    | gi   308199425 | 50 kDa  | 1 | 12 | 7  |
| 12 | PREDICTED: tubulin beta-2C chain isoform 1 [Canis lupus familiaris]                     | gi   73967439  | 50 kDa  | 1 | 10 | 9  |
| 1  | PREDICTED: chondroitin sulfate proteoglycan 4 [Canis lupus familiaris]                  | gi   345794811 | 245 kDa | 0 | 0  | 51 |
| 4  | PREDICTED: 60 kDa heat shock protein, mitochondrial [Canis lupus familiaris]            | gi   345797614 | 61 kDa  | 0 | 13 | 20 |
| 6  | PREDICTED: pyruvate kinase isozymes M1/M2 isoform 1 [Canis lupus familiaris]            | gi   74000677  | 58 kDa  | 0 | 18 | 15 |
| 7  | PREDICTED: ATP synthase subunit beta, mitochondrial isoform 1 [Canis lupus familiaris]  | gi   73968432  | 56 kDa  | 0 | 11 | 16 |
| 8  | PREDICTED: LOW QUALITY PROTEIN: plexin-B2 [Canis lupus familiaris]                      | gi   345777068 | 205 kDa | 0 | 5  | 20 |
| 9  | PREDICTED: heat shock protein HSP 90-alpha isoform 1 [Canis lupus familiaris]           | gi   359320163 | 78 kDa  | 0 | 13 | 8  |
| 11 | PREDICTED: elongation factor 2 [Canis lupus familiaris]                                 | gi   359322142 | 95 kDa  | 0 | 14 | 10 |
| 14 | PREDICTED: ATP synthase subunit alpha, mitochondrial isoform 2 [Canis lupus familiaris] | gi   345802726 | 60 kDa  | 0 | 8  | 14 |
| 16 | peroxiredoxin-1 [Canis lupus familiaris]                                                | gi   356461044 | 22 kDa  | 0 | 6  | 7  |
| 17 | PREDICTED: heat shock cognate 71 kDa protein isoform 1 [Canis lupus familiaris]         | gi   57085907  | 71 kDa  | 0 | 10 | 5  |
| 20 | PREDICTED: heat shock protein HSP 90-beta isoform 1 [Canis lupus familiaris]            | gi   359320981 | 83 kDa  | 0 | 10 | 4  |
| 22 | PREDICTED: malate dehydrogenase, mitochondrial [Canis lupus familiaris]                 | gi   73957776  | 35 kDa  | 0 | 6  | 9  |

|    |                                                                                                                                                                    |                |         |   |   |    |
|----|--------------------------------------------------------------------------------------------------------------------------------------------------------------------|----------------|---------|---|---|----|
| 24 | PREDICTED: ephrin type-A receptor 2 isoform 1 [Canis lupus familiaris]                                                                                             | gi   73950854  | 108 kDa | 0 | 3 | 14 |
| 25 | PREDICTED: probable serine protease HTRA3 [Canis lupus familiaris]                                                                                                 | gi   345798114 | 53 kDa  | 0 | 8 | 5  |
| 26 | PREDICTED: inactive tyrosine-protein kinase 7 isoform 1 [Canis lupus familiaris]                                                                                   | gi   73972878  | 118 kDa | 0 | 1 | 16 |
| 27 | PREDICTED: protein disulfide-isomerase [Canis lupus familiaris]                                                                                                    | gi   73964749  | 57 kDa  | 0 | 2 | 11 |
| 28 | eukaryotic initiation factor 4A-I [Canis lupus familiaris]                                                                                                         | gi   354623039 | 46 kDa  | 0 | 4 | 6  |
| 29 | alkaline phosphatase [Canis lupus familiaris]                                                                                                                      | gi   23267155  | 56 kDa  | 0 | 5 | 6  |
| 30 | PREDICTED: ADP/ATP translocase 2 isoform 2 [Canis lupus familiaris]                                                                                                | gi   74008194  | 33 kDa  | 0 | 3 | 6  |
| 31 | PREDICTED: alpha-2-HS-glycoprotein isoform 1 [Canis lupus familiaris]                                                                                              | gi   359323766 | 39 kDa  | 0 | 3 | 3  |
| 32 | PREDICTED: dolichyl-diphosphooligosaccharide--protein glycosyltransferase subunit 1 isoform 3 [Canis lupus familiaris]                                             | gi   73984484  | 69 kDa  | 0 | 1 | 9  |
| 33 | RecName: Full=Sodium/potassium-transporting ATPase subunit alpha-1; Short=Na/K ATPase alpha-1 subunit; AltName: Full=Sodium pump subunit alpha-1; Flags: Precursor | gi   1703466   | 113 kDa | 0 | 0 | 11 |
| 34 | cyclophilin A [Canis lupus familiaris]                                                                                                                             | gi   8699209   | 17 kDa  | 0 | 4 | 8  |
| 35 | RecName: Full=Creatine kinase B-type; AltName: Full=B-CK; AltName: Full=Creatine kinase B chain                                                                    | gi   125292    | 43 kDa  | 0 | 1 | 8  |
| 37 | PREDICTED: elongation factor 1-gamma isoform 1 [Canis lupus familiaris]                                                                                            | gi   73983414  | 50 kDa  | 0 | 2 | 6  |

|    |                                                                                                              |                |         |   |   |   |
|----|--------------------------------------------------------------------------------------------------------------|----------------|---------|---|---|---|
| 38 | PREDICTED: C-type mannose receptor 2, partial [Canis lupus familiaris]                                       | gi   345804924 | 162 kDa | 0 | 1 | 7 |
| 40 | PREDICTED: 78 kDa glucose-regulated protein isoform 5 [Canis lupus familiaris]                               | gi   345806081 | 72 kDa  | 0 | 3 | 7 |
| 41 | PREDICTED: fructose-bisphosphate aldolase A isoform 2 [Canis lupus familiaris]                               | gi   73958481  | 40 kDa  | 0 | 4 | 3 |
| 42 | ubiquitin-60S ribosomal protein L40 [Canis lupus familiaris]                                                 | gi   224994158 | 15 kDa  | 0 | 2 | 2 |
| 43 | PREDICTED: LOW QUALITY PROTEIN: alpha-enolase isoform 1 [Canis lupus familiaris]                             | gi   345800677 | 49 kDa  | 0 | 3 | 7 |
| 44 | PREDICTED: LOW QUALITY PROTEIN: protocadherin Fat 1 [Canis lupus familiaris]                                 | gi   345781801 | 507 kDa | 0 | 7 | 0 |
| 45 | unnamed protein product [Canis lupus familiaris]                                                             | gi   207008756 | 29 kDa  | 0 | 3 | 2 |
| 46 | PREDICTED: delta-sarcoglycan [Canis lupus familiaris]                                                        | gi   345799473 | 32 kDa  | 0 | 1 | 6 |
| 47 | PREDICTED: CD109 antigen isoform 3 [Canis lupus familiaris]                                                  | gi   359321010 | 162 kDa | 0 | 0 | 6 |
| 48 | CD44 antigen precursor [Canis lupus familiaris]                                                              | gi   308081450 | 40 kDa  | 0 | 3 | 3 |
| 49 | PREDICTED: alpha-actinin-4 isoform 2 [Canis lupus familiaris]                                                | gi   73947718  | 105 kDa | 0 | 4 | 4 |
| 50 | PREDICTED: annexin A1 [Canis lupus familiaris]                                                               | gi   73946797  | 39 kDa  | 0 | 5 | 3 |
| 51 | PREDICTED: LOW QUALITY PROTEIN: heterogeneous nuclear ribonucleoprotein U isoform 1 [Canis lupus familiaris] | gi   345802949 | 96 kDa  | 0 | 3 | 2 |
| 52 | Chain A, Structure Of Full Length Grp94 With Amp-Pnp Bound                                                   | gi   159794954 | 76 kDa  | 0 | 2 | 4 |
| 53 | PREDICTED: T-complex protein 1 subunit beta isoform 1 [Canis lupus familiaris]                               | gi   73968673  | 57 kDa  | 0 | 4 | 2 |

|    |                                                                                                   |                |         |   |   |   |
|----|---------------------------------------------------------------------------------------------------|----------------|---------|---|---|---|
| 54 | PREDICTED: transitional endoplasmic reticulum ATPase isoform 3 [Canis lupus familiaris]           | gi   73971210  | 89 kDa  | 0 | 2 | 2 |
| 55 | PREDICTED: poly(rC)-binding protein 2 isoform 1 [Canis lupus familiaris]                          | gi   73996203  | 38 kDa  | 0 | 2 | 4 |
| 56 | PREDICTED: sodium/potassium-transporting ATPase subunit alpha-3 [Canis lupus familiaris]          | gi   359318809 | 129 kDa | 0 | 1 | 3 |
| 57 | PREDICTED: glypican-4 [Canis lupus familiaris]                                                    | gi   74008970  | 62 kDa  | 0 | 0 | 3 |
| 58 | PREDICTED: 4F2 cell-surface antigen heavy chain [Canis lupus familiaris]                          | gi   73983790  | 62 kDa  | 0 | 0 | 3 |
| 60 | PREDICTED: cadherin-11 isoform 1 [Canis lupus familiaris]                                         | gi   73957344  | 88 kDa  | 0 | 1 | 4 |
| 61 | PREDICTED: ATP-citrate synthase isoform 2 [Canis lupus familiaris]                                | gi   73965857  | 121 kDa | 0 | 2 | 3 |
| 62 | PREDICTED: heterogeneous nuclear ribonucleoprotein H isoform 19 [Canis lupus familiaris]          | gi   73970381  | 49 kDa  | 0 | 2 | 3 |
| 63 | L-lactate dehydrogenase B chain [Canis lupus familiaris]                                          | gi   356461040 | 37 kDa  | 0 | 1 | 3 |
| 64 | PREDICTED: tubulin alpha-1A chain isoform 10 [Canis lupus familiaris]                             | gi   345792156 | 50 kDa  | 0 | 2 | 2 |
| 65 | galectin-1 [Canis lupus familiaris]                                                               | gi   313766806 | 15 kDa  | 0 | 0 | 4 |
| 66 | PREDICTED: neuropilin-1 isoform 2 [Canis lupus familiaris]                                        | gi   345793339 | 103 kDa | 0 | 0 | 6 |
| 67 | PREDICTED: voltage-dependent anion-selective channel protein 2 isoform 2 [Canis lupus familiaris] | gi   73953093  | 32 kDa  | 0 | 3 | 2 |
| 68 | PREDICTED: filamin-A isoform 9 [Canis lupus familiaris]                                           | gi   345807377 | 275 kDa | 0 | 1 | 3 |

|    |                                                                                                                                                                       |                |         |   |   |   |
|----|-----------------------------------------------------------------------------------------------------------------------------------------------------------------------|----------------|---------|---|---|---|
| 69 | PREDICTED: histone H4-like [Canis lupus familiaris]                                                                                                                   | gi   345792378 | 11 kDa  | 0 | 2 | 1 |
| 70 | PREDICTED: T-complex protein 1 subunit theta isoform 1 [Canis lupus familiaris]                                                                                       | gi   74001080  | 60 kDa  | 0 | 2 | 2 |
| 71 | PREDICTED: neurogenic locus notch homolog protein 2 isoform 1 [Canis lupus familiaris]                                                                                | gi   345782746 | 265 kDa | 0 | 1 | 5 |
| 72 | PREDICTED: fatty acid synthase [Canis lupus familiaris]                                                                                                               | gi   73964695  | 269 kDa | 0 | 0 | 4 |
| 73 | 40S ribosomal protein S4, X isoform [Canis lupus familiaris]                                                                                                          | gi   354725914 | 30 kDa  | 0 | 3 | 1 |
| 74 | RecName: Full=Apolipoprotein A-I; Short=Apo-AI; Short=ApoA-I; AltName: Full=Apolipoprotein A1; Contains: RecName: Full=Truncated apolipoprotein A-I; Flags: Precursor | gi   3915607   | 30 kDa  | 0 | 2 | 1 |
| 75 | PREDICTED: cytoskeleton-associated protein 4 [Canis lupus familiaris]                                                                                                 | gi   73969959  | 65 kDa  | 0 | 0 | 3 |
| 76 | PREDICTED: cysteine-rich secretory protein LCCL domain-containing 2 [Canis lupus familiaris]                                                                          | gi   345801034 | 56 kDa  | 0 | 4 | 0 |
| 78 | PREDICTED: pleiotrophin [Canis lupus familiaris]                                                                                                                      | gi   73978886  | 19 kDa  | 0 | 0 | 3 |
| 79 | PREDICTED: vasorin [Canis lupus familiaris]                                                                                                                           | gi   345802354 | 71 kDa  | 0 | 1 | 4 |
| 80 | PREDICTED: EMILIN-1, partial [Canis lupus familiaris]                                                                                                                 | gi   345781934 | 107 kDa | 0 | 3 | 1 |
| 81 | collagen alpha-3(VI) chain precursor [Canis lupus familiaris]                                                                                                         | gi   157151714 | 343 kDa | 0 | 0 | 5 |
| 82 | PREDICTED: collagen alpha-1(VI) chain [Canis lupus familiaris]                                                                                                        | gi   359323606 | 109 kDa | 0 | 0 | 5 |
| 83 | PREDICTED: serotransferrin isoform 1 [Canis lupus familiaris]                                                                                                         | gi   73990142  | 78 kDa  | 0 | 3 | 0 |

|    |                                                                                                                                                                     |                |         |   |   |   |
|----|---------------------------------------------------------------------------------------------------------------------------------------------------------------------|----------------|---------|---|---|---|
| 84 | heterogeneous nuclear ribonucleoprotein K [Canis lupus familiaris]                                                                                                  | gi   375065844 | 51 kDa  | 0 | 1 | 2 |
| 85 | Chain i, Structure Of A Mammalian Ribosomal 60s Subunit Within An 80s Complex Obtained By Docking Homology Models Of The Rna And Proteins Into An 8.7 A Cryo-Em Map | gi   187609307 | 18 kDa  | 0 | 1 | 2 |
| 86 | plasminogen [Canis lupus familiaris]                                                                                                                                | gi   18139619  | 41 kDa  | 0 | 2 | 1 |
| 87 | PREDICTED: inter-alpha-trypsin inhibitor heavy chain H2 [Canis lupus familiaris]                                                                                    | gi   73949158  | 107 kDa | 0 | 2 | 0 |
| 88 | PREDICTED: protein sidekick-2 [Canis lupus familiaris]                                                                                                              | gi   345804803 | 239 kDa | 0 | 0 | 3 |
| 89 | platelet glycoprotein IIIa [Canis lupus familiaris]                                                                                                                 | gi   4206165   | 86 kDa  | 0 | 0 | 3 |
| 90 | PREDICTED: hyaluronan and proteoglycan link protein 1 isoform 2 [Canis lupus familiaris]                                                                            | gi   73952134  | 40 kDa  | 0 | 3 | 0 |
| 91 | alpha-fetoprotein [Canis lupus familiaris]                                                                                                                          | gi   22218072  | 69 kDa  | 0 | 2 | 0 |
| 92 | PREDICTED: T-complex protein 1 subunit alpha isoform 1 [Canis lupus familiaris]                                                                                     | gi   57032236  | 60 kDa  | 0 | 2 | 2 |
| 93 | PREDICTED: T-complex protein 1 subunit gamma isoform 1 [Canis lupus familiaris]                                                                                     | gi   345802573 | 61 kDa  | 0 | 1 | 2 |
| 94 | Chain b, Structure Of A Mammalian Ribosomal 60s Subunit Within An 80s Complex Obtained By Docking Homology Models Of The Rna And Proteins Into An 8.7 A Cryo-Em Map | gi   187609300 | 46 kDa  | 0 | 2 | 1 |
| 95 | BAT1 [Canis lupus familiaris]                                                                                                                                       | gi   39540669  | 49 kDa  | 0 | 2 | 1 |
| 96 | Chain c, Structure Of A Mammalian Ribosomal 40s Subunit Within An 80s Complex Obtained By Docking Homology Models Of The Rna And Proteins Into An 8.7               | gi   187609257 | 27 kDa  | 0 | 3 | 0 |

|     |                                                                                                 |                |         |   |   |   |
|-----|-------------------------------------------------------------------------------------------------|----------------|---------|---|---|---|
|     | A Cryo-Em Map                                                                                   |                |         |   |   |   |
| 97  | RecName: Full=Ras-related protein Rab-10                                                        | gi   131804    | 23 kDa  | 0 | 0 | 2 |
| 98  | PREDICTED: tubulin beta chain [Canis lupus familiaris]                                          | gi   345778644 | 42 kDa  | 0 | 2 | 0 |
| 99  | PREDICTED: neural cell adhesion molecule L1 isoform 1 [Canis lupus familiaris]                  | gi   345807361 | 140 kDa | 0 | 0 | 2 |
| 100 | PREDICTED: bone morphogenetic protein 1-like [Canis lupus familiaris]                           | gi   359322833 | 113 kDa | 0 | 0 | 4 |
| 101 | PREDICTED: carboxypeptidase Z [Canis lupus familiaris]                                          | gi   345798118 | 71 kDa  | 0 | 0 | 3 |
| 102 | guanine nucleotide-binding regulatory protein alpha inhibitory subunit [Canis lupus familiaris] | gi   45505263  | 41 kDa  | 0 | 0 | 2 |
| 103 | PREDICTED: seprase isoform 1 [Canis lupus familiaris]                                           | gi   345797011 | 85 kDa  | 0 | 0 | 2 |
| 104 | Na+/K+-exchanging ATPase (EC 3.6.3.9) alpha chain - dog (fragment)                              | gi   104142    | 24 kDa  | 0 | 0 | 2 |
| 105 | PREDICTED: neuroplastin [Canis lupus familiaris]                                                | gi   345794779 | 47 kDa  | 0 | 0 | 2 |
| 106 | PREDICTED: fascin isoform 1 [Canis lupus familiaris]                                            | gi   345801349 | 55 kDa  | 0 | 1 | 2 |
| 107 | PREDICTED: plasma membrane calcium-transporting ATPase 4 isoform 3 [Canis lupus familiaris]     | gi   74005825  | 129 kDa | 0 | 0 | 3 |
| 108 | PREDICTED: collagen alpha-2(VI) chain-like [Canis lupus familiaris]                             | gi   359323618 | 87 kDa  | 0 | 0 | 2 |
| 109 | pp90 precursor [Canis lupus familiaris]                                                         | gi   1838958   | 68 kDa  | 0 | 0 | 2 |



|     |                                                                                                           |                |         |   |   |   |
|-----|-----------------------------------------------------------------------------------------------------------|----------------|---------|---|---|---|
| 110 | PREDICTED: serine hydroxymethyltransferase, mitochondrial isoform 2 [Canis lupus familiaris]              | gi   73968474  | 56 kDa  | 0 | 0 | 2 |
| 111 | PREDICTED: protein disulfide-isomerase A4 isoform 3 [Canis lupus familiaris]                              | gi   359321459 | 72 kDa  | 0 | 0 | 2 |
| 112 | PREDICTED: d-3-phosphoglycerate dehydrogenase-like [Canis lupus familiaris]                               | gi   359321669 | 57 kDa  | 0 | 0 | 2 |
| 113 | PREDICTED: protein disulfide-isomerase A3 [Canis lupus familiaris]                                        | gi   345794865 | 57 kDa  | 0 | 0 | 2 |
| 114 | PREDICTED: L-lactate dehydrogenase A chain isoform 1 [Canis lupus familiaris]                             | gi   345787872 | 37 kDa  | 0 | 0 | 2 |
| 115 | PREDICTED: ATP-dependent RNA helicase DDX3X isoform 3 [Canis lupus familiaris]                            | gi   74006722  | 73 kDa  | 0 | 3 | 0 |
| 116 | RecName: Full=Intercellular adhesion molecule 1; Short=ICAM-1; AltName: CD_antigen=CD54; Flags: Precursor | gi   2506778   | 58 kDa  | 0 | 2 | 0 |
| 117 | PREDICTED: clathrin heavy chain 1 isoform 1 [Canis lupus familiaris]                                      | gi   73966629  | 192 kDa | 0 | 0 | 2 |
| 118 | PREDICTED: heterogeneous nuclear ribonucleoprotein A1-like isoform 2 [Canis lupus familiaris]             | gi   73996139  | 34 kDa  | 0 | 2 | 0 |
| 119 | putative secreted frizzled related protein 2 [Canis lupus familiaris]                                     | gi   30519782  | 33 kDa  | 0 | 0 | 2 |
| 120 | PREDICTED: coagulation factor V [Canis lupus familiaris]                                                  | gi   345803274 | 250 kDa | 0 | 2 | 0 |
| 121 | PREDICTED: importin subunit beta-1 isoform 1 [Canis lupus familiaris]                                     | gi   73966186  | 97 kDa  | 0 | 0 | 2 |
| 122 | PREDICTED: heterogeneous nuclear ribonucleoprotein D0 isoform 2 [Canis lupus familiaris]                  | gi   74001695  | 33 kDa  | 0 | 2 | 0 |
