# Supplementary material for: Comparative analysis of the surface exposed proteome of two canine osteosarcoma cell lines and normal canine osteoblasts
Source: PubMed Central journal article supplement (PMC3684535; doi:10.1186/1746-6148-9-116), 2013-06-13
Supplement: 1746-6148-9-116-S2.pdf [file 1746-6148-9-116-S2.pdf]

| #  | Identified Proteins (114)                                                                                                    | Accession Number | Molecular Weight | # of unique peptides |           |           |            |            |            |          |          |          |
|----|------------------------------------------------------------------------------------------------------------------------------|------------------|------------------|----------------------|-----------|-----------|------------|------------|------------|----------|----------|----------|
|    |                                                                                                                              |                  |                  | CNOB-Rep1            | CNOB-Rep2 | CNOB-Rep3 | HMPOS-Rep1 | HMPOS-Rep2 | HMPOS-Rep3 | POS-Rep1 | POS-Rep2 | POS-Rep3 |
| 1  | PREDICTED: chondroitin sulfate proteoglycan 4 [Canis lupus familiaris]                                                       | gi 345794811     | 245 kDa          | 0                    | 0         | 0         | 0          | 0          | 0          | 8        | 42       | 45       |
| 2  | PREDICTED: tubulin alpha-1B chain [Canis lupus familiaris]                                                                   | gi 345792158     | 52 kDa           | 3                    | 0         | 0         | 8          | 9          | 18         | 11       | 11       | 8        |
| 3  | PREDICTED: serine protease HTRA1 [Canis lupus familiaris]                                                                    | gi 345792549     | 41 kDa           | 0                    | 0         | 0         | 5          | 9          | 8          | 8        | 13       | 14       |
| 4  | PREDICTED: 60 kDa heat shock protein, mitochondrial [Canis lupus familiaris]                                                 | gi 345797614     | 61 kDa           | 0                    | 0         | 0         | 11         | 3          | 9          | 14       | 15       | 10       |
| 5  | elongation factor 1-alpha 1 [Canis lupus familiaris]                                                                         | gi 308199425     | 50 kDa           | 1                    | 0         | 0         | 4          | 6          | 13         | 5        | 4        | 9        |
| 6  | PREDICTED: pyruvate kinase isozymes M1/M2 isoform 1 [Canis lupus familiaris]                                                 | gi 74000677      | 58 kDa           | 0                    | 0         | 0         | 5          | 2          | 22         | 12       | 6        | 4        |
| 7  | annexin 2 [Canis lupus familiaris]                                                                                           | gi 37695552      | 39 kDa           | 3                    | 0         | 1         | 4          | 4          | 11         | 8        | 4        | 7        |
| 8  | PREDICTED: LOW QUALITY PROTEIN: plexin-B2 [Canis lupus familiaris]                                                           | gi 345777068     | 205 kDa          | 0                    | 0         | 0         | 3          | 1          | 0          | 3        | 18       | 17       |
| 9  | PREDICTED: heat shock protein HSP 90-alpha isoform 1 [Canis lupus familiaris]                                                | gi 359320163     | 78 kDa           | 0                    | 0         | 0         | 5          | 6          | 19         | 3        | 3        | 4        |
| 10 | PREDICTED: ATP synthase subunit beta, mitochondrial isoform 1 [Canis lupus familiaris]                                       | gi 73968432      | 56 kDa           | 0                    | 0         | 0         | 8          | 7          | 6          | 10       | 8        | 6        |
| 11 | PREDICTED: glyceraldehyde-3-phosphate dehydrogenase-like [Canis lupus familiaris]                                            | gi 345807932     | 36 kDa           | 5                    | 1         | 0         | 4          | 6          | 11         | 5        | 4        | 3        |
| 12 | PREDICTED: tubulin beta-2C chain isoform 1 [Canis lupus familiaris]                                                          | gi 73967439      | 50 kDa           | 1                    | 0         | 0         | 8          | 6          | 10         | 6        | 8        | 7        |
| 13 | PREDICTED: elongation factor 2 [Canis lupus familiaris]                                                                      | gi 359322142     | 95 kDa           | 0                    | 0         | 0         | 0          | 4          | 17         | 5        | 7        | 6        |
| 14 | serpin peptidase inhibitor, clade H (heat shock protein 47), member 1, (collagen binding protein 1) [Canis lupus familiaris] | gi 254674398     | 47 kDa           | 3                    | 0         | 1         | 5          | 3          | 5          | 8        | 7        | 5        |
| 15 | PREDICTED: ATP synthase subunit alpha, mitochondrial isoform 2 [Canis lupus familiaris]                                      | gi 345802726     | 60 kDa           | 0                    | 0         | 0         | 3          | 2          | 7          | 6        | 8        | 7        |
| 16 | peroxiredoxin-1 [Canis lupus familiaris]                                                                                     | gi 356461044     | 22 kDa           | 0                    | 0         | 0         | 2          | 4          | 8          | 5        | 4        | 3        |
| 17 | PREDICTED: ephrin type-A receptor 2 isoform 1 [Canis lupus familiaris]                                                       | gi 73950854      | 108 kDa          | 0                    | 0         | 0         | 1          | 2          | 1          | 1        | 7        | 12       |
| 18 | PREDICTED: protein CYR61 [Canis lupus familiaris]                                                                            | gi 73960107      | 42 kDa           | 3                    | 0         | 0         | 6          | 11         | 9          | 0        | 1        | 0        |
| 19 | PREDICTED: heat shock protein HSP 90-beta isoform 1 [Canis lupus familiaris]                                                 | gi 359320981     | 83 kDa           | 0                    | 0         | 0         | 2          | 2          | 11         | 2        | 2        | 4        |
| 20 | PREDICTED: inactive tyrosine-protein kinase 7 isoform 1 [Canis lupus familiaris]                                             | gi 73972878      | 118 kDa          | 0                    | 0         | 0         | 1          | 0          | 0          | 0        | 10       | 12       |

|    |                                                                                                                                                                     |              |         |    |   |   |   |   |    |   |   |    |
|----|---------------------------------------------------------------------------------------------------------------------------------------------------------------------|--------------|---------|----|---|---|---|---|----|---|---|----|
| 21 | PREDICTED: heat shock cognate 71 kDa protein isoform 1 [Canis lupus familiaris]                                                                                     | gi 57085907  | 71 kDa  | 0  | 0 | 0 | 4 | 3 | 13 | 3 | 1 | 1  |
| 22 | PREDICTED: prelamin-A/C isoform 4 [Canis lupus familiaris]                                                                                                          | gi 73960920  | 74 kDa  | 3  | 1 | 0 | 4 | 2 | 10 | 4 | 1 | 0  |
| 23 | PREDICTED: malate dehydrogenase, mitochondrial [Canis lupus familiaris]                                                                                             | gi 73957776  | 35 kDa  | 0  | 0 | 0 | 2 | 5 | 4  | 7 | 7 | 4  |
| 24 | PREDICTED: histone H2A type 1-E-like [Canis lupus familiaris]                                                                                                       | gi 345796934 | 14 kDa  | 0  | 0 | 0 | 1 | 1 | 5  | 2 | 1 | 2  |
| 25 | PREDICTED: fibronectin [Canis lupus familiaris]                                                                                                                     | gi 345797318 | 271 kDa | 11 | 1 | 0 | 4 | 1 | 0  | 0 | 6 | 2  |
| 26 | eukaryotic initiation factor 4A-I [Canis lupus familiaris]                                                                                                          | gi 354623039 | 46 kDa  | 0  | 0 | 0 | 1 | 2 | 5  | 2 | 5 | 3  |
| 27 | PREDICTED: probable serine protease HTRA3 [Canis lupus familiaris]                                                                                                  | gi 345798114 | 53 kDa  | 0  | 0 | 0 | 1 | 5 | 4  | 1 | 5 | 2  |
| 28 | alkaline phosphatase [Canis lupus familiaris]                                                                                                                       | gi 23267155  | 56 kDa  | 0  | 0 | 0 | 3 | 5 | 2  | 1 | 4 | 6  |
| 29 | PREDICTED: dolichyl-diphosphooligosaccharide--protein glycosyltransferase subunit 1 isoform 3 [Canis lupus familiaris]                                              | gi 73984484  | 69 kDa  | 0  | 0 | 0 | 0 | 0 | 1  | 2 | 6 | 9  |
| 30 | PREDICTED: thrombospondin-1 [Canis lupus familiaris]                                                                                                                | gi 345794639 | 130 kDa | 13 | 7 | 1 | 0 | 0 | 0  | 0 | 0 | 0  |
| 31 | RecName: Full=Sodium/potassium-transporting ATPase subunit alpha-1; Short=Na /K ATPase alpha-1 subunit; AltName: Full=Sodium pump subunit alpha-1; Flags: Precursor | gi 1703466   | 113 kDa | 0  | 0 | 0 | 0 | 0 | 0  | 0 | 5 | 12 |
| 32 | PREDICTED: ADP/ATP translocase 2 isoform 2 [Canis lupus familiaris]                                                                                                 | gi 74008194  | 33 kDa  | 0  | 0 | 0 | 2 | 1 | 4  | 0 | 5 | 5  |
| 33 | PREDICTED: protein disulfide-isomerase [Canis lupus familiaris]                                                                                                     | gi 73964749  | 57 kDa  | 0  | 0 | 0 | 0 | 0 | 3  | 5 | 7 | 2  |
| 34 | PREDICTED: elongation factor 1-gamma isoform 1 [Canis lupus familiaris]                                                                                             | gi 73983414  | 50 kDa  | 0  | 0 | 0 | 1 | 2 | 1  | 1 | 4 | 6  |
| 35 | PREDICTED: alpha-2-HS-glycoprotein isoform 1 [Canis lupus familiaris]                                                                                               | gi 359323766 | 39 kDa  | 0  | 0 | 0 | 1 | 3 | 3  | 2 | 0 | 2  |
| 36 | cyclophilin A [Canis lupus familiaris]                                                                                                                              | gi 8699209   | 17 kDa  | 0  | 0 | 0 | 0 | 2 | 5  | 6 | 0 | 0  |
| 37 | PREDICTED: C-type mannose receptor 2, partial [Canis lupus familiaris]                                                                                              | gi 345804924 | 162 kDa | 0  | 0 | 0 | 0 | 0 | 0  | 0 | 4 | 5  |
| 38 | PREDICTED: 78 kDa glucose-regulated protein isoform 5 [Canis lupus familiaris]                                                                                      | gi 345806081 | 72 kDa  | 0  | 0 | 0 | 1 | 0 | 4  | 3 | 5 | 1  |
| 39 | plasminogen activator inhibitor 1 precursor [Canis lupus familiaris]                                                                                                | gi 308193314 | 45 kDa  | 8  | 3 | 1 | 0 | 0 | 0  | 0 | 0 | 0  |
| 40 | RecName: Full=Creatine kinase B-type; AltName: Full=B-CK; AltName: Full=Creatine kinase B chain                                                                     | gi 125292    | 43 kDa  | 0  | 0 | 0 | 0 | 0 | 1  | 6 | 3 | 3  |
| 41 | vitronectin [Canis lupus]                                                                                                                                           | gi 62421374  | 8 kDa   | 1  | 0 | 1 | 1 | 2 | 1  | 2 | 2 | 1  |
| 42 | PREDICTED: fructose-bisphosphate aldolase A isoform 2 [Canis lupus familiaris]                                                                                      | gi 73958481  | 40 kDa  | 0  | 0 | 0 | 1 | 1 | 6  | 2 | 0 | 0  |
| 43 | PREDICTED: CD109 antigen isoform 3 [Canis lupus familiaris]                                                                                                         | gi 359321010 | 162 kDa | 0  | 0 | 0 | 0 | 0 | 0  | 0 | 4 | 5  |
| 44 | unnamed protein product [Canis lupus familiaris]                                                                                                                    | gi 207008756 | 29 kDa  | 0  | 0 | 0 | 1 | 1 | 3  | 1 | 0 | 1  |
| 45 | RecName: Full=CD44 antigen                                                                                                                                          | gi 2499844   | 38 kDa  | 0  | 0 | 0 | 2 | 0 | 0  | 0 | 3 | 2  |

|    |                                                                                                                                                                       |              |         |   |   |   |   |   |   |   |   |   |
|----|-----------------------------------------------------------------------------------------------------------------------------------------------------------------------|--------------|---------|---|---|---|---|---|---|---|---|---|
| 46 | PREDICTED: annexin A1 [Canis lupus familiaris]                                                                                                                        | gi 73946797  | 39 kDa  | 0 | 0 | 0 | 1 | 1 | 7 | 1 | 0 | 2 |
| 47 | PREDICTED: LOW QUALITY PROTEIN: alpha-enolase isoform 1 [Canis lupus familiaris]                                                                                      | gi 345800677 | 49 kDa  | 0 | 0 | 0 | 0 | 0 | 3 | 5 | 1 | 0 |
| 48 | PREDICTED: LOW QUALITY PROTEIN: protocadherin Fat 1 [Canis lupus familiaris]                                                                                          | gi 345781801 | 507 kDa | 0 | 0 | 0 | 2 | 5 | 0 | 0 | 1 | 2 |
| 49 | ubiquitin-60S ribosomal protein L40 [Canis lupus familiaris]                                                                                                          | gi 224994158 | 15 kDa  | 0 | 0 | 0 | 2 | 0 | 3 | 1 | 2 | 2 |
| 50 | PREDICTED: alpha-actinin-4 isoform 2 [Canis lupus familiaris]                                                                                                         | gi 73947718  | 105 kDa | 0 | 0 | 0 | 1 | 0 | 4 | 2 | 1 | 1 |
| 51 | PREDICTED: delta-sarcoglycan [Canis lupus familiaris]                                                                                                                 | gi 345799473 | 32 kDa  | 0 | 0 | 0 | 0 | 0 | 0 | 1 | 6 | 4 |
| 52 | PREDICTED: T-complex protein 1 subunit beta isoform 1 [Canis lupus familiaris]                                                                                        | gi 73968673  | 57 kDa  | 0 | 0 | 0 | 1 | 1 | 2 | 1 | 2 | 0 |
| 53 | PREDICTED: sodium/potassium-transporting ATPase subunit alpha-3 [Canis lupus familiaris]                                                                              | gi 359318809 | 129 kDa | 0 | 0 | 0 | 0 | 1 | 0 | 1 | 3 | 3 |
| 54 | PREDICTED: LOW QUALITY PROTEIN: heterogeneous nuclear ribonucleoprotein U isoform 1 [Canis lupus familiaris]                                                          | gi 345802949 | 96 kDa  | 0 | 0 | 0 | 1 | 0 | 3 | 1 | 1 | 0 |
| 55 | Chain A, Structure Of Full Length Grp94 With Amp-Pnp Bound                                                                                                            | gi 159794954 | 76 kDa  | 0 | 0 | 0 | 2 | 0 | 1 | 1 | 2 | 2 |
| 56 | PREDICTED: ATP-citrate synthase isoform 2 [Canis lupus familiaris]                                                                                                    | gi 73965857  | 121 kDa | 0 | 0 | 0 | 1 | 0 | 2 | 1 | 1 | 2 |
| 57 | PREDICTED: glypican-4 [Canis lupus familiaris]                                                                                                                        | gi 74008970  | 62 kDa  | 0 | 0 | 0 | 0 | 0 | 0 | 1 | 3 | 3 |
| 58 | L-lactate dehydrogenase B chain [Canis lupus familiaris]                                                                                                              | gi 356461040 | 37 kDa  | 0 | 0 | 0 | 0 | 0 | 2 | 1 | 2 | 1 |
| 59 | PREDICTED: poly(rC)-binding protein 2 isoform 1 [Canis lupus familiaris]                                                                                              | gi 73996203  | 38 kDa  | 0 | 0 | 0 | 1 | 1 | 2 | 2 | 3 | 0 |
| 60 | PREDICTED: cadherin-11 isoform 1 [Canis lupus familiaris]                                                                                                             | gi 73957344  | 88 kDa  | 0 | 0 | 0 | 0 | 1 | 0 | 1 | 3 | 3 |
| 61 | PREDICTED: integrin beta-1 [Canis lupus familiaris]                                                                                                                   | gi 345793345 | 88 kDa  | 1 | 0 | 0 | 0 | 0 | 0 | 0 | 3 | 3 |
| 62 | PREDICTED: 4F2 cell-surface antigen heavy chain [Canis lupus familiaris]                                                                                              | gi 73983790  | 62 kDa  | 0 | 0 | 0 | 0 | 0 | 0 | 0 | 1 | 3 |
| 63 | PREDICTED: neuropilin-1 isoform 2 [Canis lupus familiaris]                                                                                                            | gi 345793339 | 103 kDa | 0 | 0 | 0 | 0 | 0 | 0 | 0 | 5 | 5 |
| 64 | PREDICTED: fatty acid synthase [Canis lupus familiaris]                                                                                                               | gi 73964695  | 269 kDa | 0 | 0 | 0 | 0 | 0 | 0 | 0 | 4 | 1 |
| 65 | RecName: Full=Apolipoprotein A-I; Short=Apo-AI; Short=ApoA-I; AltName: Full=Apolipoprotein A1; Contains: RecName: Full=Truncated apolipoprotein A-I; Flags: Precursor | gi 3915607   | 30 kDa  | 0 | 0 | 0 | 1 | 2 | 2 | 1 | 1 | 1 |
| 66 | PREDICTED: voltage-dependent anion-selective channel protein 2 isoform 2 [Canis lupus familiaris]                                                                     | gi 73953093  | 32 kDa  | 0 | 0 | 0 | 1 | 2 | 2 | 0 | 2 | 0 |
| 67 | PREDICTED: heterogeneous nuclear ribonucleoprotein H isoform 19 [Canis lupus familiaris]                                                                              | gi 73970381  | 49 kDa  | 0 | 0 | 0 | 0 | 0 | 2 | 0 | 2 | 1 |
| 68 | PREDICTED: tubulin alpha-1A chain isoform 10 [Canis lupus familiaris]                                                                                                 | gi 345792156 | 50 kDa  | 0 | 0 | 0 | 1 | 1 | 2 | 1 | 1 | 2 |

|    |                                                                                                                                                                     |              |         |   |   |   |   |   |   |   |   |   |
|----|---------------------------------------------------------------------------------------------------------------------------------------------------------------------|--------------|---------|---|---|---|---|---|---|---|---|---|
| 69 | PREDICTED: T-complex protein 1 subunit theta isoform 1 [Canis lupus familiaris]                                                                                     | gi 74001080  | 60 kDa  | 0 | 0 | 0 | 2 | 0 | 2 | 1 | 2 | 1 |
| 70 | 40S ribosomal protein S4, X isoform [Canis lupus familiaris]                                                                                                        | gi 354725914 | 30 kDa  | 0 | 0 | 0 | 1 | 0 | 3 | 1 | 1 | 0 |
| 71 | PREDICTED: histone H4-like [Canis lupus familiaris]                                                                                                                 | gi 345792378 | 11 kDa  | 0 | 0 | 0 | 0 | 1 | 3 | 0 | 0 | 0 |
| 72 | PREDICTED: neurogenic locus notch homolog protein 2 isoform 1 [Canis lupus familiaris]                                                                              | gi 345782746 | 265 kDa | 0 | 0 | 0 | 1 | 0 | 0 | 0 | 5 | 1 |
| 73 | PREDICTED: cysteine-rich secretory protein LCCL domain-containing 2 [Canis lupus familiaris]                                                                        | gi 345801034 | 56 kDa  | 0 | 0 | 0 | 3 | 2 | 0 | 0 | 0 | 0 |
| 74 | PREDICTED: cytoskeleton-associated protein 4 [Canis lupus familiaris]                                                                                               | gi 73969959  | 65 kDa  | 0 | 0 | 0 | 0 | 0 | 0 | 1 | 3 | 1 |
| 75 | PREDICTED: pleiotrophin [Canis lupus familiaris]                                                                                                                    | gi 73978886  | 19 kDa  | 0 | 0 | 0 | 0 | 0 | 0 | 2 | 2 | 1 |
| 76 | PREDICTED: vasorin [Canis lupus familiaris]                                                                                                                         | gi 345802354 | 71 kDa  | 0 | 0 | 0 | 1 | 0 | 0 | 0 | 3 | 1 |
| 77 | galectin-1 [Canis lupus familiaris]                                                                                                                                 | gi 313766806 | 15 kDa  | 0 | 0 | 0 | 0 | 0 | 1 | 2 | 1 | 0 |
| 78 | PREDICTED: collagen alpha-1(VI) chain [Canis lupus familiaris]                                                                                                      | gi 359323606 | 109 kDa | 0 | 0 | 0 | 0 | 0 | 0 | 0 | 5 | 2 |
| 79 | Chain i, Structure Of A Mammalian Ribosomal 60s Subunit Within An 80s Complex Obtained By Docking Homology Models Of The Rna And Proteins Into An 8.7 A Cryo-Em Map | gi 187609307 | 18 kDa  | 0 | 0 | 0 | 0 | 1 | 1 | 2 | 0 | 0 |
| 80 | PREDICTED: filamin-A isoform 9 [Canis lupus familiaris]                                                                                                             | gi 345807377 | 275 kDa | 0 | 0 | 0 | 0 | 0 | 1 | 0 | 0 | 2 |
| 81 | collagen alpha-3(VI) chain precursor [Canis lupus familiaris]                                                                                                       | gi 157151714 | 343 kDa | 0 | 0 | 0 | 0 | 0 | 0 | 0 | 4 | 2 |
| 82 | PREDICTED: serotransferrin isoform 1 [Canis lupus familiaris]                                                                                                       | gi 73990142  | 78 kDa  | 0 | 0 | 0 | 3 | 2 | 0 | 0 | 0 | 0 |
| 83 | platelet glycoprotein IIIa [Canis lupus familiaris]                                                                                                                 | gi 4206165   | 86 kDa  | 0 | 0 | 0 | 0 | 0 | 0 | 0 | 3 | 1 |
| 84 | Chain b, Structure Of A Mammalian Ribosomal 60s Subunit Within An 80s Complex Obtained By Docking Homology Models Of The Rna And Proteins Into An 8.7 A Cryo-Em Map | gi 187609300 | 46 kDa  | 0 | 0 | 0 | 0 | 0 | 2 | 1 | 0 | 0 |
| 85 | PREDICTED: neuroplastin [Canis lupus familiaris]                                                                                                                    | gi 345794779 | 47 kDa  | 0 | 0 | 0 | 0 | 0 | 0 | 0 | 2 | 1 |
| 86 | PREDICTED: neutral amino acid transporter B(0) isoform 1 [Canis lupus familiaris]                                                                                   | gi 73947234  | 57 kDa  | 0 | 0 | 0 | 1 | 0 | 0 | 0 | 1 | 2 |
| 87 | RecName: Full=Ras-related protein Rab-10                                                                                                                            | gi 131804    | 23 kDa  | 0 | 0 | 0 | 0 | 0 | 0 | 1 | 1 | 2 |
| 88 | PREDICTED: heterogeneous nuclear ribonucleoprotein L-like [Canis lupus familiaris]                                                                                  | gi 359318672 | 64 kDa  | 0 | 0 | 0 | 0 | 0 | 3 | 0 | 0 | 0 |
| 89 | Chain c, Structure Of A Mammalian Ribosomal 40s Subunit Within An 80s Complex Obtained By Docking Homology Models Of The Rna And Proteins Into An 8.7 A Cryo-Em Map | gi 187609257 | 27 kDa  | 0 | 0 | 0 | 0 | 1 | 3 | 0 | 0 | 0 |
| 90 | PREDICTED: protein sidekick-2 [Canis lupus familiaris]                                                                                                              | gi 345804803 | 239 kDa | 0 | 0 | 0 | 0 | 0 | 0 | 0 | 3 | 2 |
| 91 | alpha-fetoprotein [Canis lupus familiaris]                                                                                                                          | gi 22218072  | 69 kDa  | 0 | 0 | 0 | 1 | 2 | 0 | 0 | 0 | 0 |

|     |                                                                                                                        |              |         |   |   |   |   |   |   |   |   |   |
|-----|------------------------------------------------------------------------------------------------------------------------|--------------|---------|---|---|---|---|---|---|---|---|---|
| 92  | PREDICTED: hyaluronan and proteoglycan link protein 1 isoform 2 [Canis lupus familiaris]                               | gi 73952134  | 40 kDa  | 0 | 0 | 0 | 1 | 2 | 0 | 0 | 0 | 0 |
| 93  | PREDICTED: bone morphogenetic protein 1-like [Canis lupus familiaris]                                                  | gi 359322833 | 113 kDa | 0 | 0 | 0 | 0 | 0 | 0 | 0 | 2 | 1 |
| 94  | PREDICTED: fascin isoform 1 [Canis lupus familiaris]                                                                   | gi 345801349 | 55 kDa  | 0 | 0 | 0 | 0 | 0 | 1 | 2 | 0 | 0 |
| 95  | BAT1 [Canis lupus familiaris]                                                                                          | gi 39540669  | 49 kDa  | 0 | 0 | 0 | 0 | 0 | 2 | 1 | 0 | 0 |
| 96  | PREDICTED: inter-alpha-trypsin inhibitor heavy chain H2 [Canis lupus familiaris]                                       | gi 73949158  | 107 kDa | 0 | 0 | 0 | 0 | 2 | 1 | 0 | 0 | 0 |
| 97  | pp90 precursor [Canis lupus familiaris]                                                                                | gi 1838958   | 68 kDa  | 0 | 0 | 0 | 0 | 0 | 0 | 0 | 2 | 2 |
| 98  | PREDICTED: seprase isoform 1 [Canis lupus familiaris]                                                                  | gi 345797011 | 85 kDa  | 0 | 0 | 0 | 0 | 0 | 0 | 0 | 2 | 2 |
| 99  | PREDICTED: collagen alpha-2(VI) chain-like [Canis lupus familiaris]                                                    | gi 359323618 | 87 kDa  | 0 | 0 | 0 | 0 | 0 | 0 | 0 | 1 | 2 |
| 100 | PREDICTED: plasma membrane calcium-transporting ATPase 4 isoform 3 [Canis lupus familiaris]                            | gi 74005825  | 129 kDa | 0 | 0 | 0 | 0 | 0 | 0 | 0 | 0 | 3 |
| 101 | PREDICTED: carboxypeptidase Z [Canis lupus familiaris]                                                                 | gi 345798118 | 71 kDa  | 0 | 0 | 0 | 0 | 0 | 0 | 0 | 3 | 0 |
| 102 | PREDICTED: integrin alpha-V isoform 2 [Canis lupus familiaris]                                                         | gi 74004771  | 109 kDa | 0 | 0 | 0 | 0 | 0 | 0 | 0 | 2 | 1 |
| 103 | PREDICTED: ATP-dependent RNA helicase DDX3X isoform 3 [Canis lupus familiaris]                                         | gi 74006722  | 73 kDa  | 0 | 0 | 0 | 0 | 0 | 3 | 0 | 0 | 0 |
| 104 | PREDICTED: polypyrimidine tract-binding protein 1 isoform 1 [Canis lupus familiaris]                                   | gi 73987389  | 60 kDa  | 0 | 0 | 0 | 0 | 0 | 2 | 1 | 0 | 0 |
| 105 | PREDICTED: importin-5 isoform 1 [Canis lupus familiaris]                                                               | gi 359322489 | 121 kDa | 0 | 0 | 0 | 0 | 0 | 0 | 0 | 0 | 2 |
| 106 | PREDICTED: heterogeneous nuclear ribonucleoprotein A1-like isoform 2 [Canis lupus familiaris]                          | gi 73996139  | 34 kDa  | 0 | 0 | 0 | 0 | 0 | 2 | 0 | 0 | 0 |
| 107 | putative secreted frizzled related protein 2 [Canis lupus familiaris]                                                  | gi 30519782  | 33 kDa  | 0 | 0 | 0 | 0 | 0 | 0 | 0 | 2 | 0 |
| 108 | PREDICTED: matrix-remodeling-associated protein 8 [Canis lupus familiaris]                                             | gi 345800581 | 50 kDa  | 0 | 0 | 0 | 0 | 0 | 0 | 0 | 2 | 0 |
| 109 | PREDICTED: coagulation factor V [Canis lupus familiaris]                                                               | gi 345803274 | 250 kDa | 0 | 0 | 0 | 0 | 2 | 0 | 0 | 0 | 0 |
| 110 | PREDICTED: trifunctional enzyme subunit alpha, mitochondrial-like [Canis lupus familiaris]                             | gi 359321587 | 83 kDa  | 0 | 0 | 0 | 0 | 0 | 0 | 0 | 2 | 0 |
| 111 | PREDICTED: profilin-1-like [Canis lupus familiaris]                                                                    | gi 73955372  | 18 kDa  | 0 | 0 | 0 | 0 | 0 | 2 | 0 | 0 | 0 |
| 112 | PREDICTED: inosine-5'-monophosphate dehydrogenase 2 isoform 5 [Canis lupus familiaris]                                 | gi 73985592  | 53 kDa  | 0 | 0 | 0 | 0 | 0 | 2 | 0 | 0 | 0 |
| 113 | PREDICTED: dolichyl-diphosphooligosaccharide--protein glycosyltransferase subunit 2 isoform 3 [Canis lupus familiaris] | gi 73991908  | 69 kDa  | 0 | 0 | 0 | 0 | 0 | 0 | 0 | 0 | 2 |
| 114 | PREDICTED: heterogeneous nuclear ribonucleoprotein D0 isoform 2 [Canis lupus familiaris]                               | gi 74001695  | 33 kDa  | 0 | 0 | 0 | 0 | 0 | 2 | 0 | 0 | 0 |
