# Supplementary material for: Comparative analysis of the surface exposed proteome of two canine osteosarcoma cell lines and normal canine osteoblasts
Source: PubMed Central journal article supplement (PMC3684535; doi:10.1186/1746-6148-9-116), 2013-06-13
Supplement: 1746-6148-9-116-S5.pdf [file 1746-6148-9-116-S5.pdf]

Supplemental Table 1: qRT-PCR Primers

**Control Genes:**

GAPDHcanFor: TATGTTGTGGAGTCCACTGGG  
GAPDHcanRev: TCTTCTGGGTGGCAGTGATGG  
Size: 280 bp

**Experimental Genes:**

CD44canFor: ATCCTCATATCCAACACCTCC  
CD44canRev: GCTCCTTTCCTACTGGAGGATCC  
Size: 246

CD109canFor: **ATGATCATGGAAA**CTCAACC  
CD109canRev: AACTCCTCACCGCTTGTCTCC  
Size: 159 bp

CSPG4canFor: AGGTCCACGACGCCCTGGAGC  
CSPG4canRev: GCCGGGAACCGCGTCACCTGG  
Product Size: 262 bp

CRISPLD2canFor: TCCTGGACAGCAAAGGTGGCC  
CRISPLD2canRev: TGGCTCGTCTTTGCAGTGTGC  
Size: 245

EPHA2canFor: CCTCGACAAGCTCATCCGCGC  
EPHA2canRev: TCGTCGTTGGTCATCTGCACC  
Size: 219

FN1canFor: CTCGGTGCTATTTGCTCCTGC  
FN1canRev: CGGGAATCTTCTCTGTCAGCC  
Size: 215 bp

NOTCH2canFor: TGTTGGGGAAAGCAACATGCC  
NOTCH2canRev: GGTACAGGTA

NRP1canFor: GACCAGTTAGTCTGGATGGCC  
NRP1canRev: CCTGGAGATGTTCTCATCACC  
Size: 291 bp

PLXNB2canFor: ACGCCTGCTACACCGGCTCCC  
PLXNB2canRev: TACTCCGCGGAGGTGCCGTCC  
Size: 309

CYR61canFor: CACACCAAGGGGCTGGAATGC  
CYR61canRev: GGGGAGCGAGAGCTCTTGGGG  
Size: 210 bp

THBS1canFor: TCCAGAGCATCTTCACCAGGG  
THBS1canRev: TGTGGCCGATGTAGTTAGTGC  
Product Size: 237
